# Supplementary material for: Simulating the effect of perennialized cropping systems on nitrate-N losses using the SWAT model
Source: Frontiers journal article supplement (doi:10.3389/fagro.2023.1180232), 2023-08-18
Supplement: Table_1.DOCX [file Table_1.DOCX]

Supplementary Material

Simulating the effect of perennialized cropping systems on nitrate-N losses using the SWAT model

Grace L. Wilson*, David J. Mulla, Nick R. Jordan, Jacob M. Jungers, Brad A. Gordon

*** Correspondence:** Corresponding Author: wils0674@umn.edu

# Supplementary Figures and Tables

## Supplementary Tables

**Supplementary Table 1.** Calibrated parameters used in SWAT simulations for the Rogers Creek Watershed (units are shown when applicable; parameters shown without units are unitless within the SWAT model).

| **Parameter** | **Description (units)** | **Calibrated Value** |
| --- | --- | --- |
| EPCO.bsn | Plant uptake compensation factor | 0.15 |
| FFCB.bsn | Initial soil water content | 0.5 |
| ADJ_PKR.bsn | Peak rate adjustment factor for tributaries | 2 |
| PRF.bsn | Peak rate adjustment factor for sediment routing in main channel | 2 |
| SPCON.bsn | Linear factor for sediment re-entrainment | 0.0002 |
| PHOSKD.bsn | Phosphorus soil partitioning coefficient (m3/Mg) | 100 |
| PSP.bsn | Phosphorus availability index | 0.6 |
| CNCOEF.bsn | Coefficient for plant ET method | 0.68 |
| ICN.bsn | Daily CN calculation method | Plant ET |
| CDN.bsn | Denitrification exponential rate coefficient | 0.01 |
| SDNCO.bsn | Denitrification threshold water content | 0.99 |
| SURLAG.bsn | Surface runoff lag coefficient | 1 |
| CH_N(1).sub | Mannings n for tributary channels | 0.06 |
| CH_K(1).sub | Effective hydraulic conductivity in tributary alluvium (mm/hr) | 12 |
| SHALLST.gw | Initial depth of water in shallow aquifer (mm) | 500 |
| DEEPST.gw | Initial depth of water in deep aquifer (mm) | 1000 |
| GW_DELAY.gw | Groundwater delay time (days) | 15 |
| ALPHA_BF.gw | Baseflow recession constant (1/days) | 0.1 |
| GWQMIN.gw | Threshold depth of water for return flow (mm) | 500 |
| REVAPMN.gw | Threshold depth of water for percolation to deep aquifer (mm) | 500 |
| RCHRG_DP.gw | Deep aquifer percolation fraction | 0.01 |
| DEP_IMP.hru | Depth to impervious layer in soil profile (mm) | 2000 |
| ERORGP.hru | Organic P enrichment ratio for loading with sediment | 1 |

**Supplementary Table 2.** Calibrated parameters used in SWAT crop database files (crop.dat) for IWG and winter camelina crops. Default values for IWG were for the “slender intermediate wheatgrass,” and “spring canola-Polish” for winter camelina.

|  | **IWG** | | **Winter Camelina** | |
| --- | --- | --- | --- | --- |
| **Crop.dat Parameter** | **Default Value** | **Calibrated Value** | **Default Value** | **Calibrated Value** |
| BIOE | 35 | 30 | 34 | 20 |
| HVSTI | 0.9 | 0.4 | 0.23 | 0.5 |
| BLAI | 4 | 4 | 3.5 | 2.5 |
| FRGRW1 | 0.15 | 0.015 | 0.15 | 0.15 |
| LAIMX1 | 0.01 | 0.01 | 0.02 | 0.02 |
| CHTMX (m) | 0.7 | 1.4 | 0.9 | 0.7 |
| RDMX (m) | 2 | 2 | 0.9 | 0.9 |
| FRWRW2 | 0.5 | 0.45 | 0.45 | 0.5 |
| LAIMX2 | 0.95 | 0.95 | 0.95 | 0.95 |
| DLAI | 0.85 | 0.5 | 0.5 | 0.9 |
| T_Opt | 25 | 19 | 21 | 22 |
| T_base | 8 | 0 | 5 | 4 |
| CNYLDF | 0.05 | 0.025 | 0.038 | 0.038 |
| CPYLD | 0.004 | 0.0022 | 0.0079 | 0.0079 |
| BN1 (frN1) | 0.03 | 0.0663 | 0.044 | 0.044 |
| BN2 (frN2) | 0.02 | 0.0255 | 0.0164 | 0.0164 |
| BN 3 (frN3) | 0.012 | 0.0148 | 0.0128 | 0.0128 |
| BP 1 (frP1) | 0.002 | 0.0053 | 0.0074 | 0.0074 |
| BP2 (frP2) | 0.0015 | 0.002 | 0.00378 | 0.0037 |
| BP 3 (frP3) | 0.0013 | 0.0012 | 0.0023 | 0.0023 |
| WSYF | 0.9 | 0.2 | 0.01 | 0.01 |
| USEL_C | 0.003 | 0.03 | 0.2 | 0.2 |
| GSI | 0.005 | 0.006 | 0.006 | 0.006 |
| VPDFR | 4 | 4 | 4 | 4 |
| FRGMAX | 0.75 | 0.75 | 0.75 | 0.75 |
| WAVP | 8 | 6 | 10 | 10 |
| CO2HI | 660 | 660 | 660 | 660 |
| BIOEHI | 45 | 39 | 39 | 39 |
| RSDCO_PL | 0.05 | 0.05 | 0.05 | 0.05 |
| ALAI_MIN | 0 | 0 | 0 | 0 |
| BIO_LEAF | 0 | 0 | 0 | 0 |
| MAT_YRS | 0 | 0 | 0 | 0 |
| BMX_TREES | 0 | 0 | 0 | 0 |
| EXT_COEF | 0.65 | 0.65 | 0.65 | 0.65 |
| DBM_DIEOFF | 0.1 | 0.1 | 0.1 | 0.1 |
